# Supplementary material for: Simultaneous perturbation of the MAPK and the PI3K/mTOR pathways does not lead to increased radiosensitization
Source: Springer Nature journal article supplement (doi:10.1186/s13014-015-0514-5), 2015-10-24
Supplement: MOESM2 [file 9774032]

Cloning efficiencies and radiosensitivity parameters<sup>a</sup> of tumor cells treated with AZD6244 and/or NVP-BEZ235.

| Cell line    | Treatment                       | PE (%)    | SF2         | D10 (Gy)    | IF SF2 | IF D10 |
|--------------|---------------------------------|-----------|-------------|-------------|--------|--------|
| <b>SNB19</b> | <i>Control</i>                  | 53.7 ± 9  | 0.81 ± 0.10 | 9.84 ± 0.89 | 1.00   | 1.00   |
|              | <i>AZD6244</i>                  | 57.2 ± 11 | 0.64 ± 0.06 | 8.24 ± 0.48 | 1.27   | 1.20   |
|              | <i>NVP-BEZ235</i>               | 53.2 ± 10 | 0.62 ± 0.07 | 7.38 ± 0.39 | 1.31   | 1.33   |
|              | <i>AZD6244 +<br/>NVP-BEZ235</i> | 51.8 ± 5  | 0.63 ± 0.07 | 7.86 ± 0.88 | 1.27   | 1.25   |
| <b>A549</b>  | <i>Control</i>                  | 73.2 ± 7  | 0.80 ± 0.05 | 9.81 ± 0.68 | 1.00   | 1.00   |
|              | <i>AZD6244</i>                  | 78.9 ± 12 | 0.66 ± 0.05 | 8.87 ± 0.58 | 1.21   | 1.11   |
|              | <i>NVP-BEZ235</i>               | 72.3 ± 9  | 0.66 ± 0.07 | 7.15 ± 0.87 | 1.21   | 1.37   |
|              | <i>AZD6244 +<br/>NVP-BEZ235</i> | 73.7 ± 10 | 0.65 ± 0.07 | 7.06 ± 0.60 | 1.23   | 1.39   |

Abbreviations: <sup>a</sup> Means (± SD) from at least four independent experiments; PE – Plating efficiency at 0 Gy; SF2 – Surviving fraction at 2 Gy; D10 – Radiation dose required to yield 10% survival; IF SF2 – Inhibitory factor for SF2 = SF2 Control/SF2 Inhibitor; IF D10 – Inhibitory factor for D10 = D10 Control/D10 Inhibitor
