# Supplementary material for: Simultaneous perturbation of the MAPK and the PI3K/mTOR pathways does not lead to increased radiosensitization
Source: Springer Nature journal article supplement (doi:10.1186/s13014-015-0514-5), 2015-10-24

# A SNB19

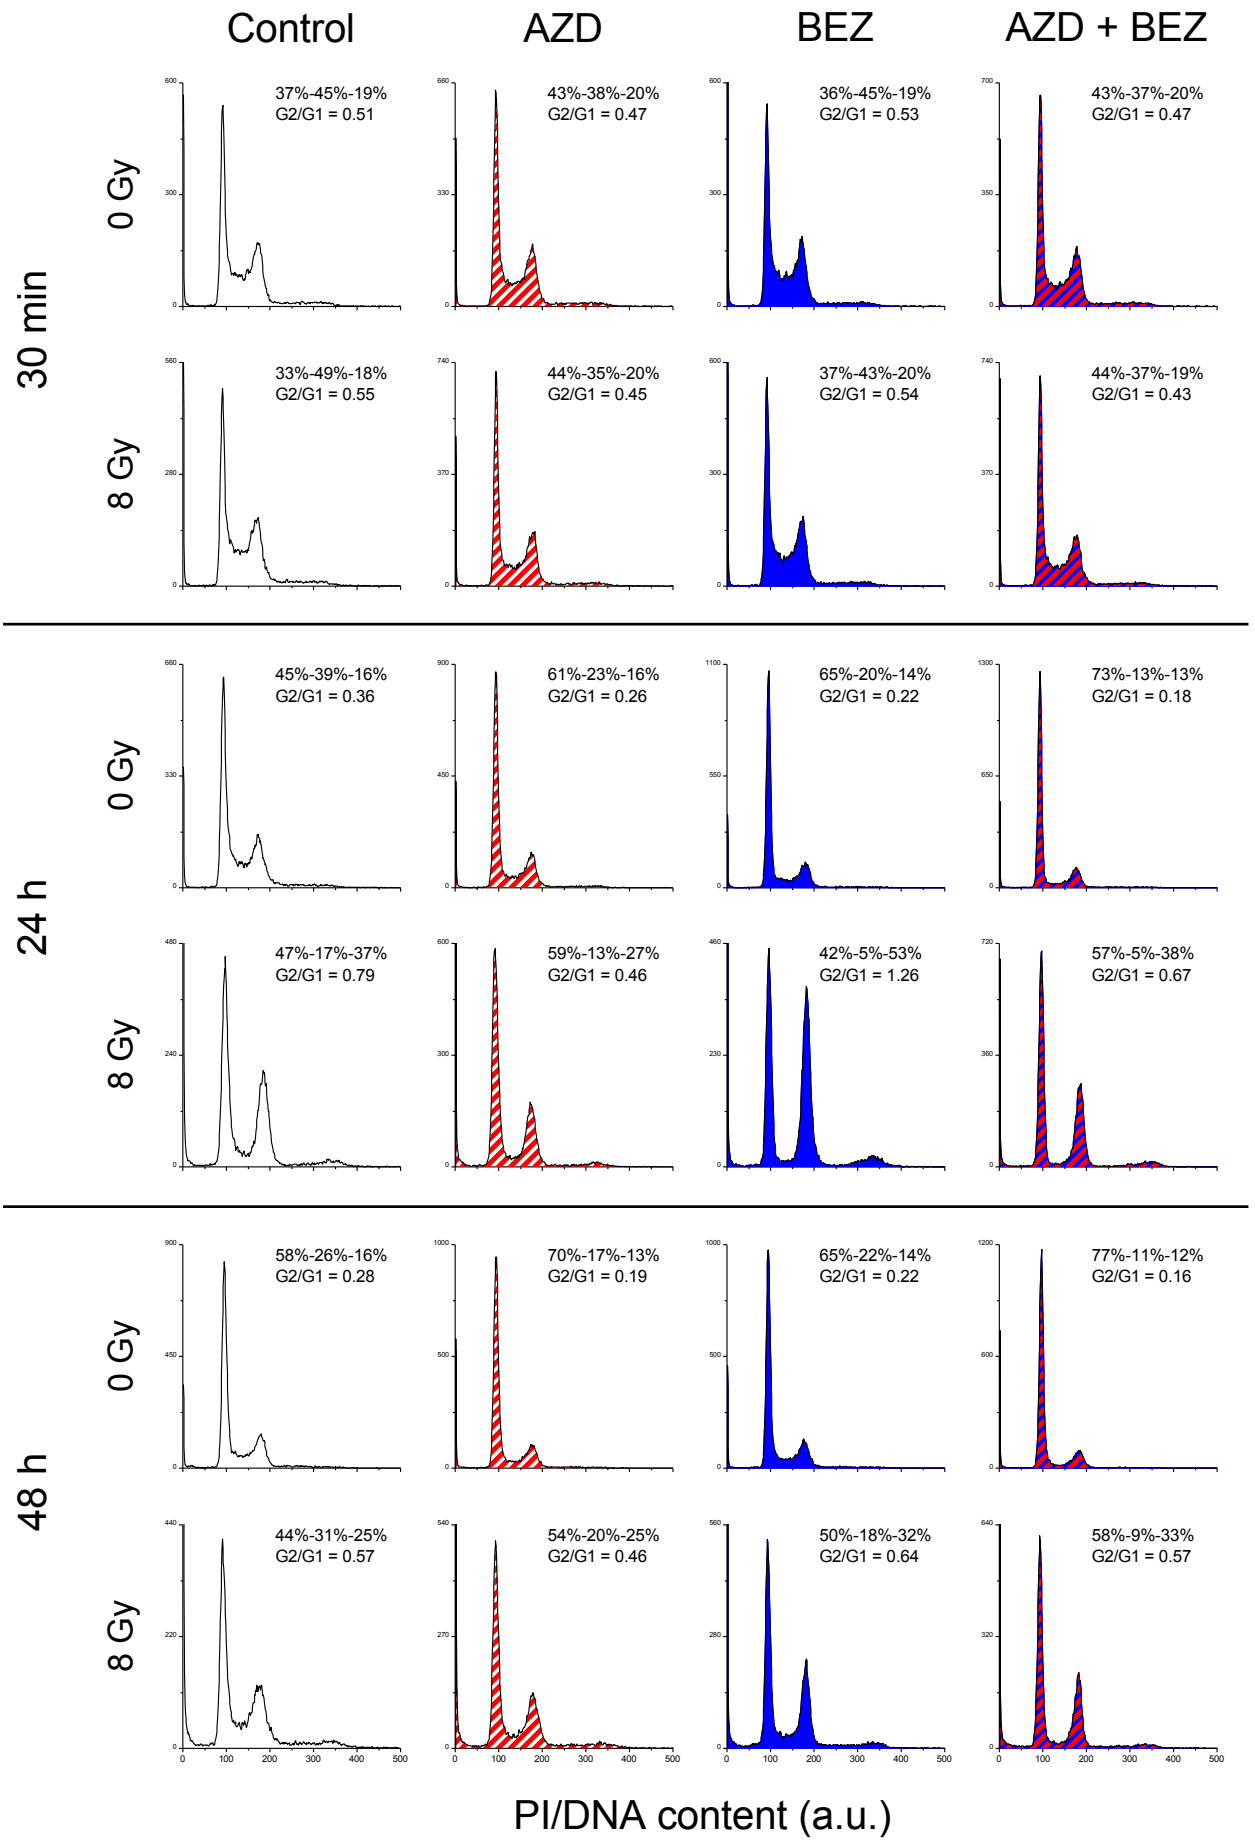

# B A549

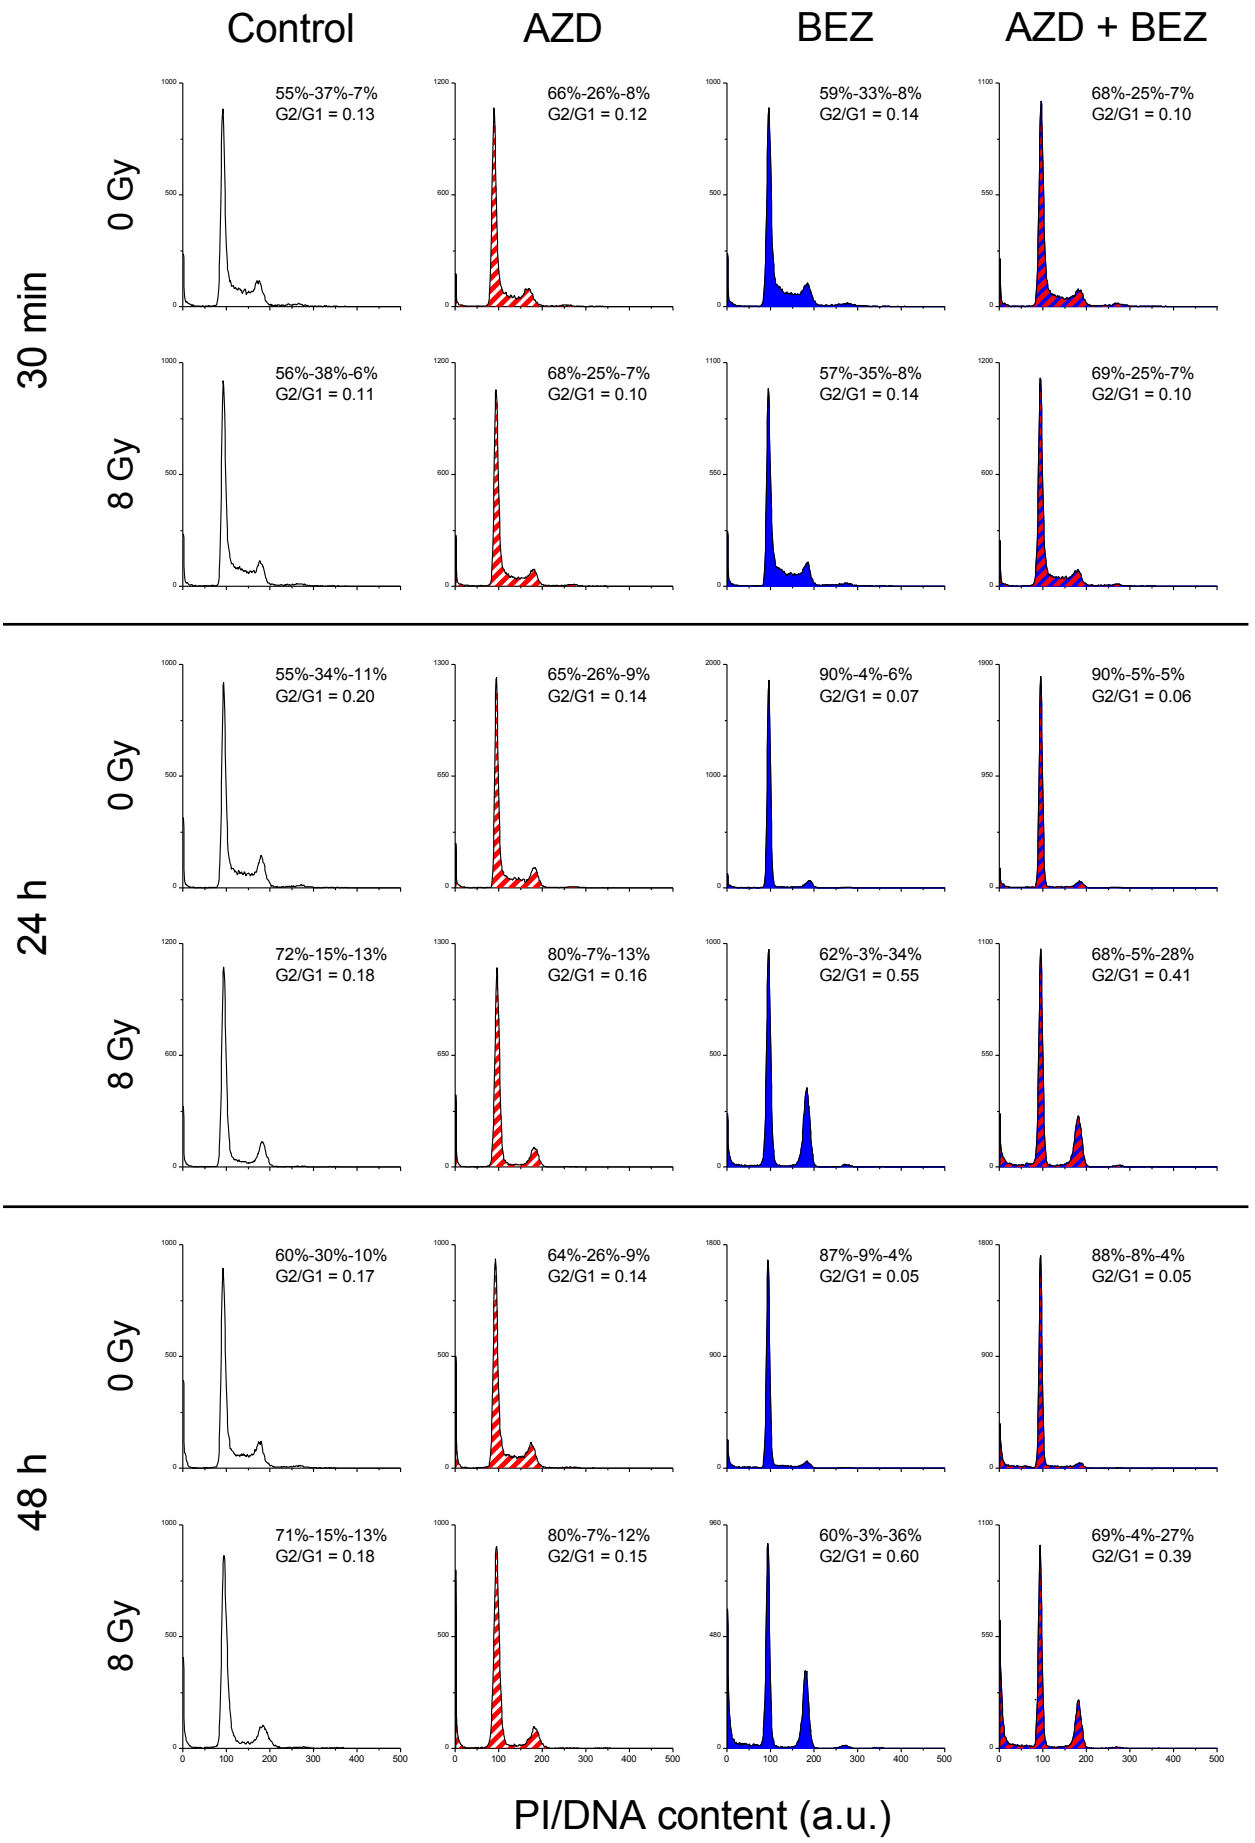

Supplement: MOESM3 [file 9774032]
